# Supplementary material for: Development of pharmacophore models for AcrB protein and the identification of potential adjuvant candidates for overcoming efflux-mediated colistin resistance
Source: Royal Society of Chemistry journal article supplement (doi:10.1039/d3md00483j), 2023-10-28
Supplement: d3md00483j2.pdf [file d3md00483j2.pdf]

**Supplementary figure S1:** ROC plot of the pharmacophore model (AHHNR.100).
