# Supplementary material for: Development of pharmacophore models for AcrB protein and the identification of potential adjuvant candidates for overcoming efflux-mediated colistin resistance
Source: Royal Society of Chemistry journal article supplement (doi:10.1039/d3md00483j), 2023-10-28
Supplement: d3md00483j3.pdf [file d3md00483j3.pdf]

**Table S1:** Antibigram profiling obtained from VITEK 2 automated system of the strains UM869, UM573 and UK48 and their interpretations as per CLSI guidelines.

| Antimicrobial                 | UM869 (MIC) | Interpretation | UM573 (MIC) | Interpretation | UK48 (MIC) | Interpretation |
|-------------------------------|-------------|----------------|-------------|----------------|------------|----------------|
| Amikacin                      | ≥64         | R              | 4           | S              | 8          | S              |
| Amoxicillin/Clavulanic Acid   | ≥32         | R              | ≥32         | R              | ≥32        | R              |
| Ampicillin                    | ---         | ---            | ≥32         | R              | ≥32        | R              |
| Cefalotin                     | ---         | ---            | ≥64         | R              | ≥64        | R              |
| Cefepime                      | ≥32         | R              | ---         | ---            | ---        | ---            |
| Cefixime                      | ---         | ---            | ≥4          | R              | ≥4         | R              |
| Cefoperazone/Sulbactam        | ≥64         | R              | ---         | ---            | ---        | ---            |
| Cefoxitin                     | ---         | ---            | ---         | ---            | ≥64        | R              |
| Ceftriaxone                   | ≥64         | R              | ---         | ---            | ---        | ---            |
| Ceftazidime                   | ---         | ---            | ≥64         | R              | ≥64        | R              |
| Ceftriaxone                   | ≥64         | R              | ≥64         | R              | ≥64        | R              |
| Cefuroxime                    | ≥64         | R              | ---         | ---            | ---        | ---            |
| Cefuroxime Axetil             | ≥64         | R              | ---         | ---            | ---        | ---            |
| Ciprofloxacin                 | ---         | ---            | ≥4          | R              | ≥4         | R              |
| Colistin                      | ≥16         | R              | ≥16         | R              | ≥16        | R              |
| Ertapenem                     | ≥8          | R              | ≥8          | R              | ≥8         | R              |
| Fosfomycin                    | ≥256        | R              | ≤16         | S              | ≤16        | S              |
| Gentamicin                    | 8           | I              | 8           | I              | ≥16        | R              |
| Imipenem                      | 4           | R              | ---         | ---            | ---        | ---            |
| Levofloxacin                  | ≥8          | R              | ---         | ---            | ---        | ---            |
| Minocycline                   | ≥16         | R              | ---         | ---            | ---        | ---            |
| Nalidixic Acid                | ---         | ---            | ≥32         | R              | ≥32        | R              |
| Nitrofurantoin                | 128         | R              | 128         | R              | 128        | R              |
| Norfloxacin                   | ---         | ---            | ≥16         | R              | ≥16        | R              |
| Ofloxacin                     | ---         | ---            | ≥8          | R              | ≥8         | R              |
| Piperacillin/Tazobactam       | ≥128        | R              | ≥128        | R              | ≥128       | R              |
| Ticarcillin                   | ---         | ---            | ≥128        | R              | ≥128       | R              |
| Trimethoprim/Sulfamethoxazole | ≥320        | R              | ≥320        | R              | ≥320       | R              |

Note: CLSI - Clinical & Laboratory Standards Institute; MIC - Minimum Inhibitory Concentration; R – Resistance; I – Intermediate; S - Sensitive
