# Supplementary figures and images for: Development of pharmacophore models for AcrB protein and the identification of potential adjuvant candidates for overcoming efflux-mediated colistin resistance
Source: Royal Society of Chemistry journal article supplement (doi:10.1039/d3md00483j), 2023-10-28

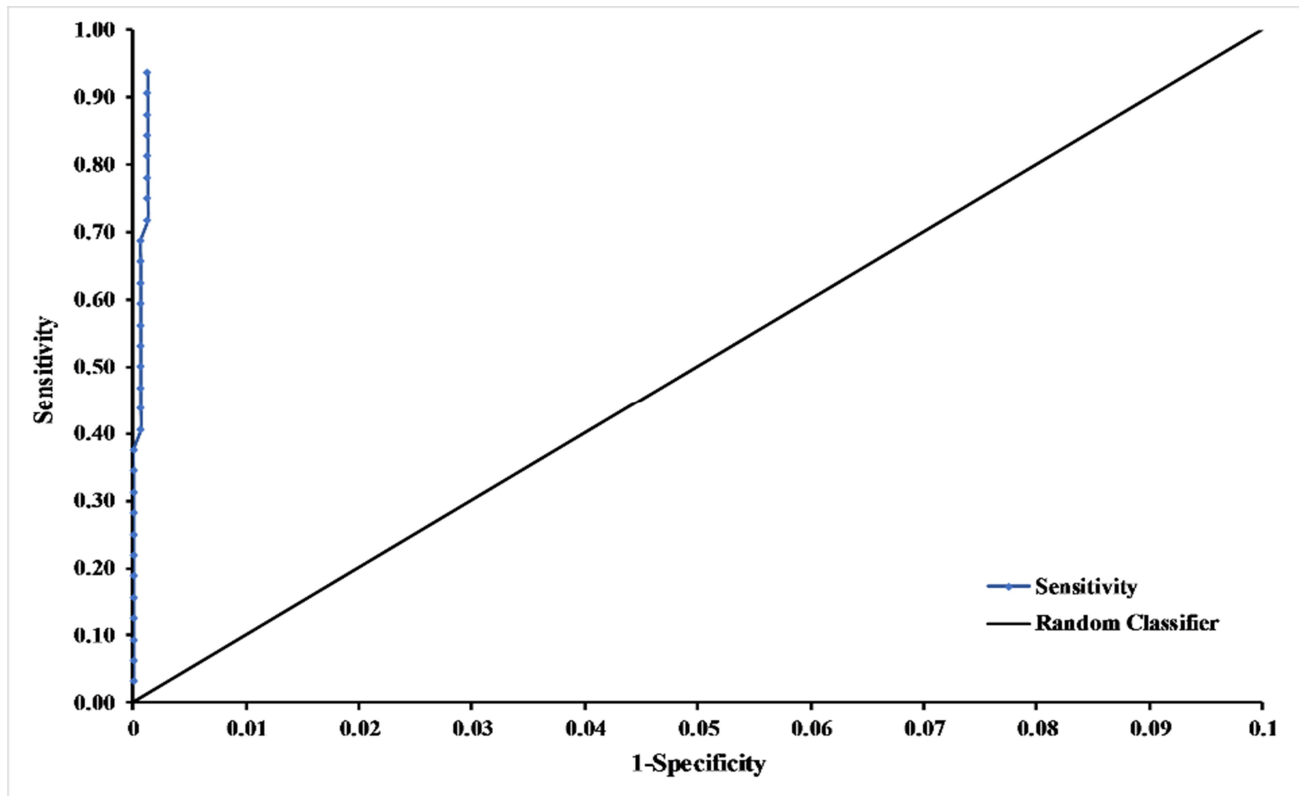

Supplement: d3md00483j1.pdf [file d3md00483j1.pdf]
